# Supplementary material for: Nonresonant powering of injectable nanoelectrodes enables wireless deep brain stimulation in freely moving mice
Source: PubMed Central journal article supplement — Sci Adv. 2021 Jan 13;7(3):eabc4189. doi: 10.1126/sciadv.abc4189 (PMC7806222; doi:10.1126/sciadv.abc4189), 2021-01-13
Supplement: abc4189_SM.pdf [file abc4189_SM.pdf]

[advances.sciencemag.org/cgi/content/full/7/3/eabc4189/DC1](https://advances.sciencemag.org/cgi/content/full/7/3/eabc4189/DC1)

## Supplementary Materials for

### **Nonresonant powering of injectable nanoelectrodes enables wireless deep brain stimulation in freely moving mice**

K. L. Kozielski\*, A. Jahanshahi, H. B. Gilbert, Y. Yu, Ö. Erin, D. Francisco, F. Alosaimi, Y. Temel, M. Sitti\*

\*Corresponding author. Email: [k.koz@kit.edu](mailto:k.koz@kit.edu) (K.L.K.); [sitti@is.mpg.de](mailto:sitti@is.mpg.de) (M.S.)

Published 13 January 2021, *Sci. Adv.* **7**, eabc4189 (2021)  
DOI: [10.1126/sciadv.abc4189](https://doi.org/10.1126/sciadv.abc4189)

#### **The PDF file includes:**

Figs. S1 to S5  
Table S1  
Legends for movies S1 and S2

#### **Other Supplementary Material for this manuscript includes the following:**

(available at [advances.sciencemag.org/cgi/content/full/7/3/eabc4189/DC1](https://advances.sciencemag.org/cgi/content/full/7/3/eabc4189/DC1))

Movies S1 and S2

## Supplementary Materials

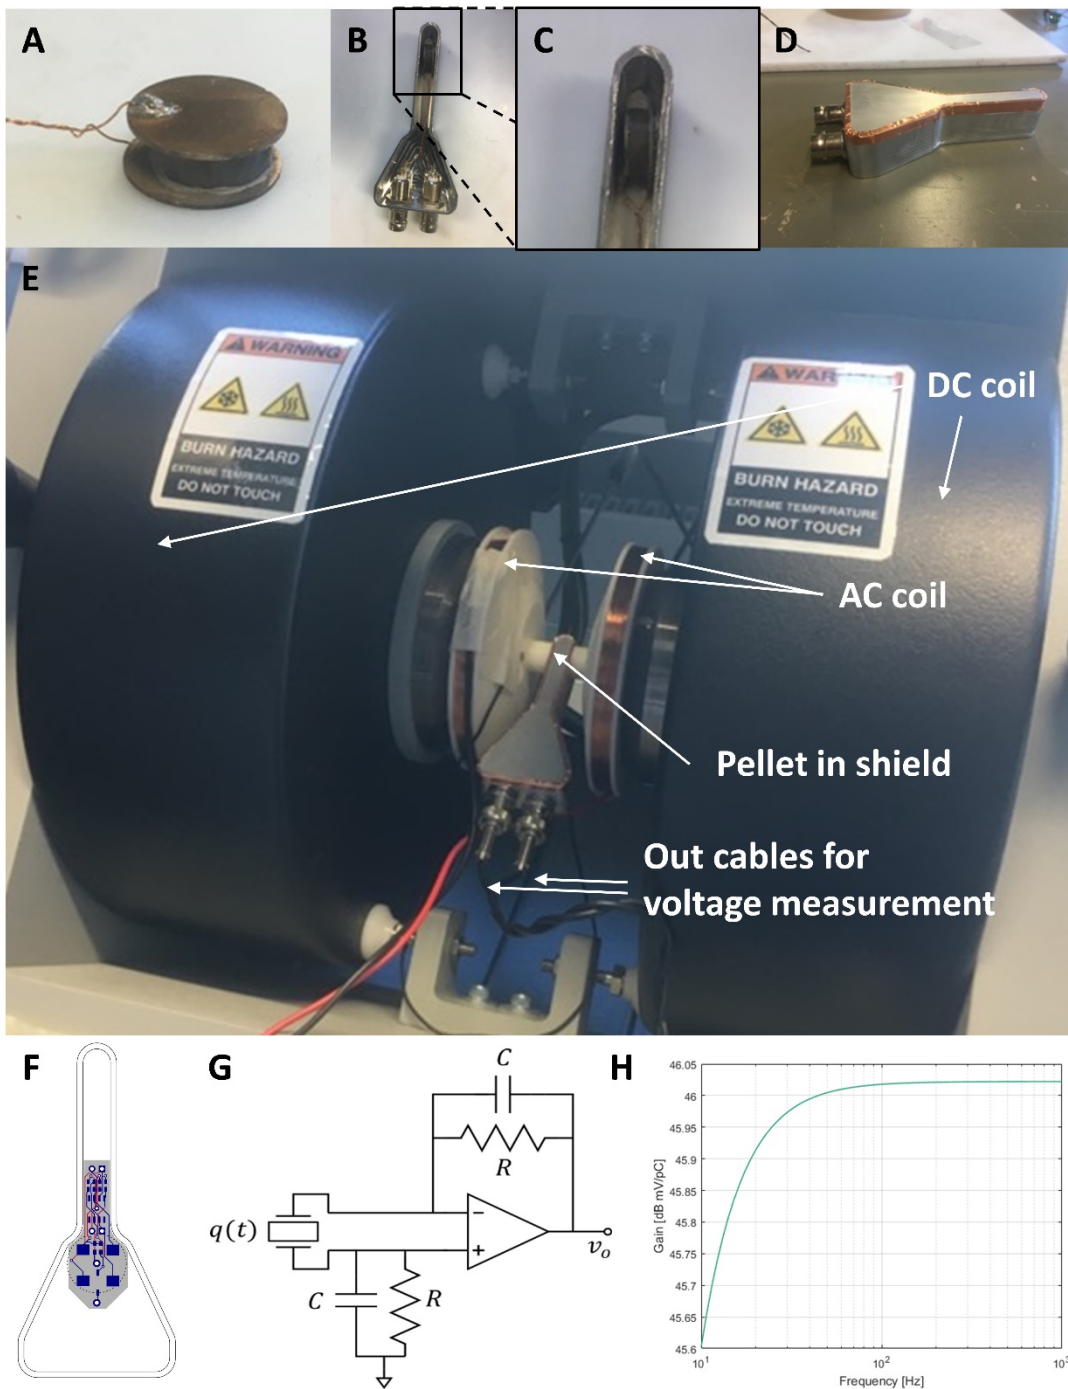

**Figure S1. Magnetolectricity measurement method.** MENPs (or MSNPs as a control) are pressed into a pellet, and wired to copper plates via conductive paste (A). Pellets are placed into a Faraday shield and wired externally to enable voltage measurement (B). Zoomed image of (B) shows pellet location in Faraday shield (C). The Faraday shield is closed with a lid and conductive copper tape (D). The

shield with pellet is placed into a coaxial DC and AC magnetic field and output voltage is measured simultaneously (**E**). Charge amplifier diagram (**F**) and circuit schematic (**G**). Simulated magnitude response function of circuit with  $R = 5 \text{ G}\Omega$  and  $C = 10 \text{ pF}$  (**H**). Photo credit: Kristen Kozielski, Max Planck Institute for Intelligent Systems (**A-E**).

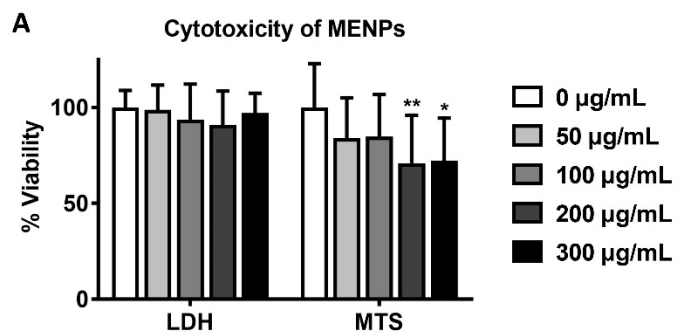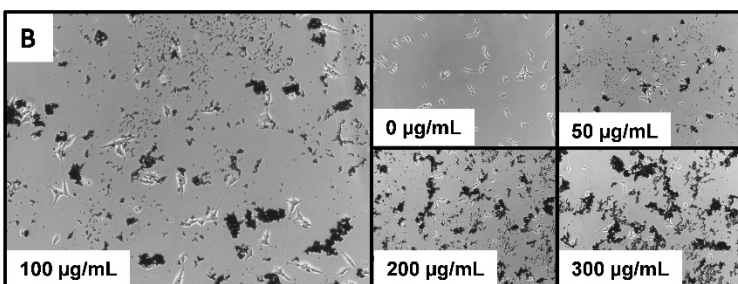

**Figure S2. *In vitro* toxicity analysis of MENPs.** Quantitative toxicity analysis of MENPs via LDH plasma membrane damage assay and MTS metabolic activity assay (**A**). Images of cells following 24 h exposure to MENPs at various concentrations. The concentration used in all further *in vitro* experiments was 100 µg/mL (**B**). Plot shows mean  $\pm$  SD (n = 3); ANOVA with Dunnett's post-test versus 0 µg/mL MENPs; \*\*p < 0.01. \*p < 0.05. unlabeled = ns.

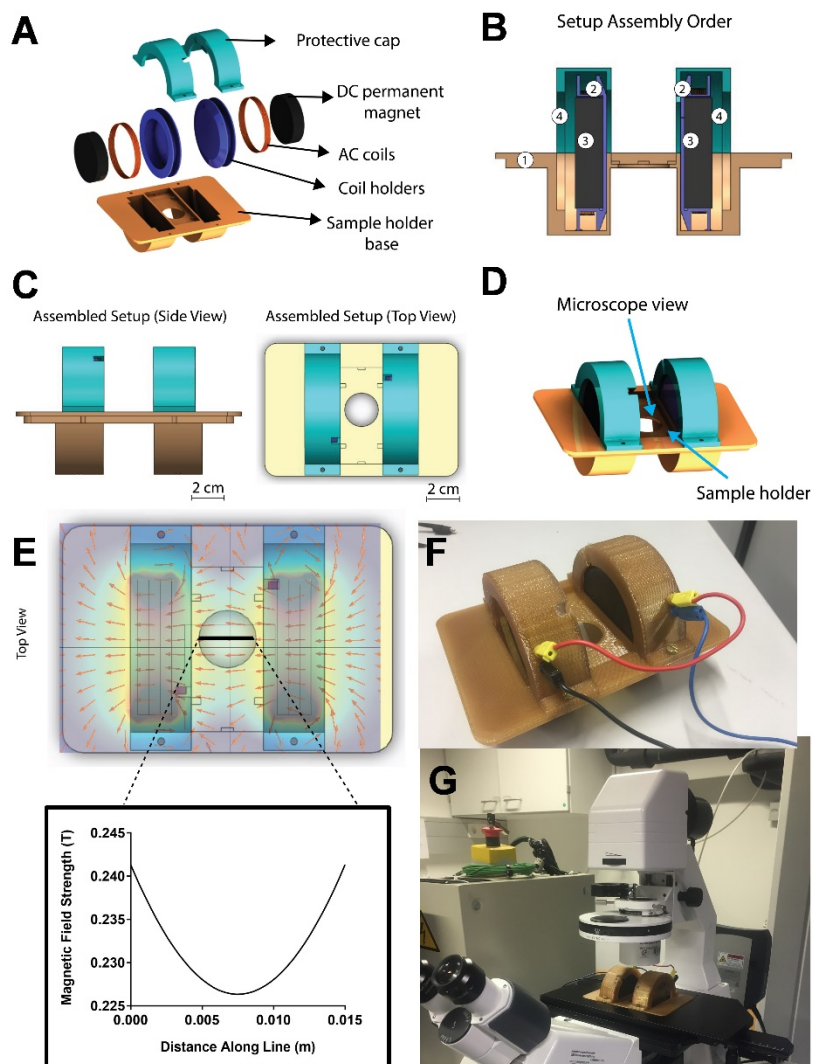

**Figure S3. *In vitro* magnetic stimulation device.** Disassembled schematic shows individual parts of the coil system (**A**). Internal view of coil system shows layout of components as assembled, with numbers describing the assembly order (**B**). Schematic of the assembled coil system from top and side views (**C**) and angled view (**D**). Plot showing magnitude of the magnetic flux density along the labeled line in the top view in Tesla (**E**). Picture of the assembled coil (**F**) and the coil mounted onto the microscope (**G**). Photo credit: Kristen Kozielski, Max Planck Institute for Intelligent Systems (**F,G**).

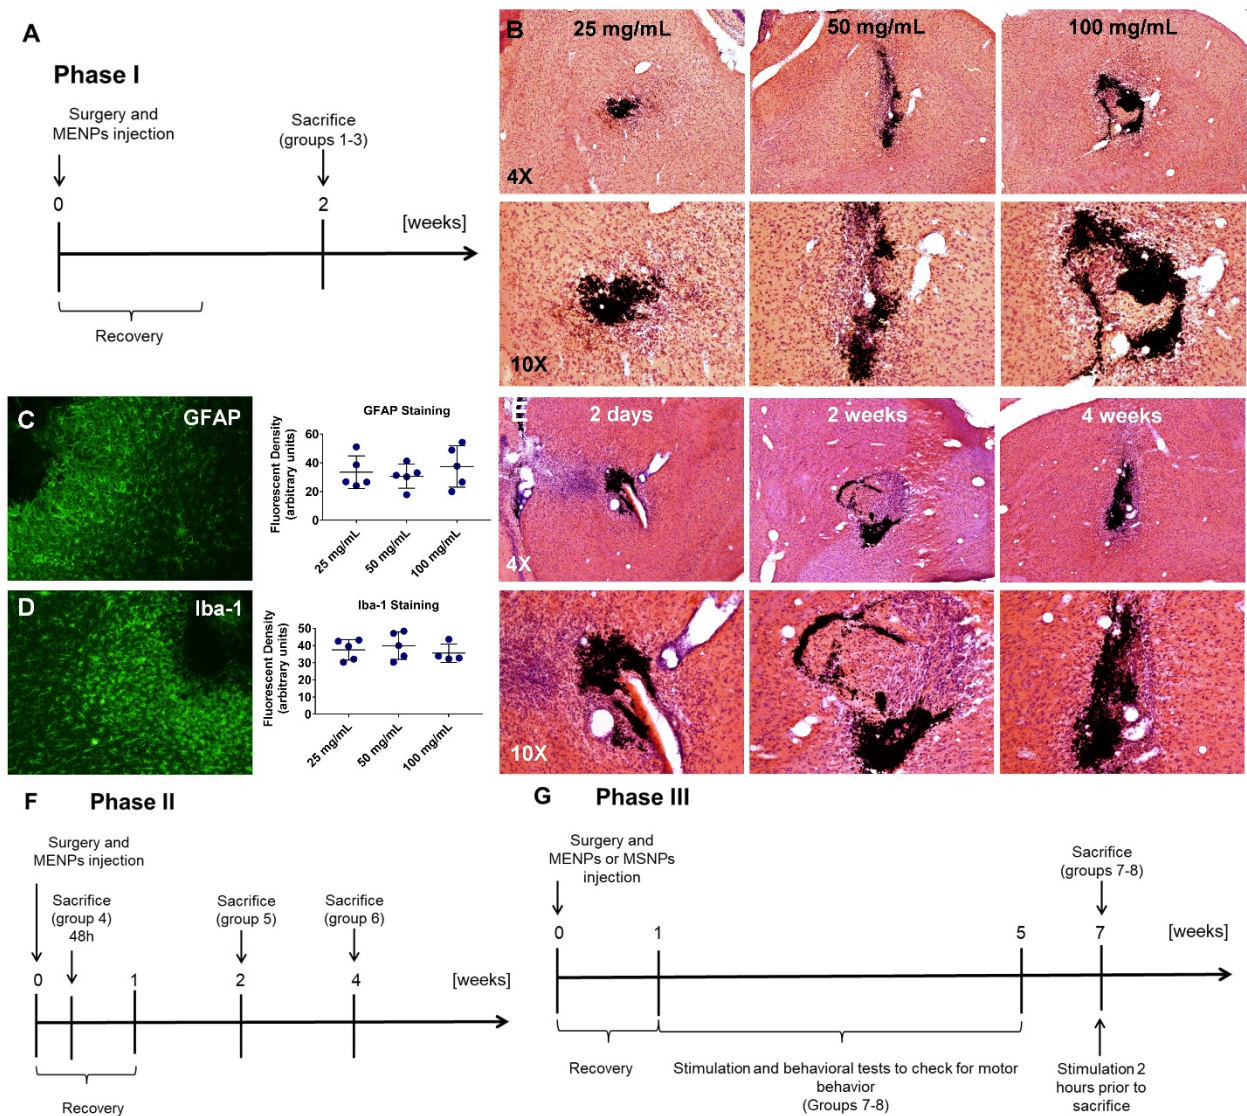

**Figure S4. *In vivo* experiment layout and analysis of tissue response to MENPs.**

Experimental layout of *in vivo* toxicity assessment, Phase 1 (A). H&E staining of tissue surrounding injection site following injection of 25, 50, or 100 mg/mL MENPs at 2 weeks post-injection (B). GFAP and Iba-1 immunohistochemical staining of tissue surrounding the injection site following injection of 25, 50, or 100 mg/mL MENPs at 2 weeks post-injection, with images of tissue with 100 mg/mL MENPs (C, D). H&E staining of tissue surrounding injection site following injection of 100 mg/mL MENPs at 2 days, 2 weeks, and 4 weeks post-injection (E). Timeline layout of experimental Phase II (F). Timeline layout of experimental Phase III (G). Plots show mean  $\pm$  SD (C, D) ( $n = 4 - 5$ ).

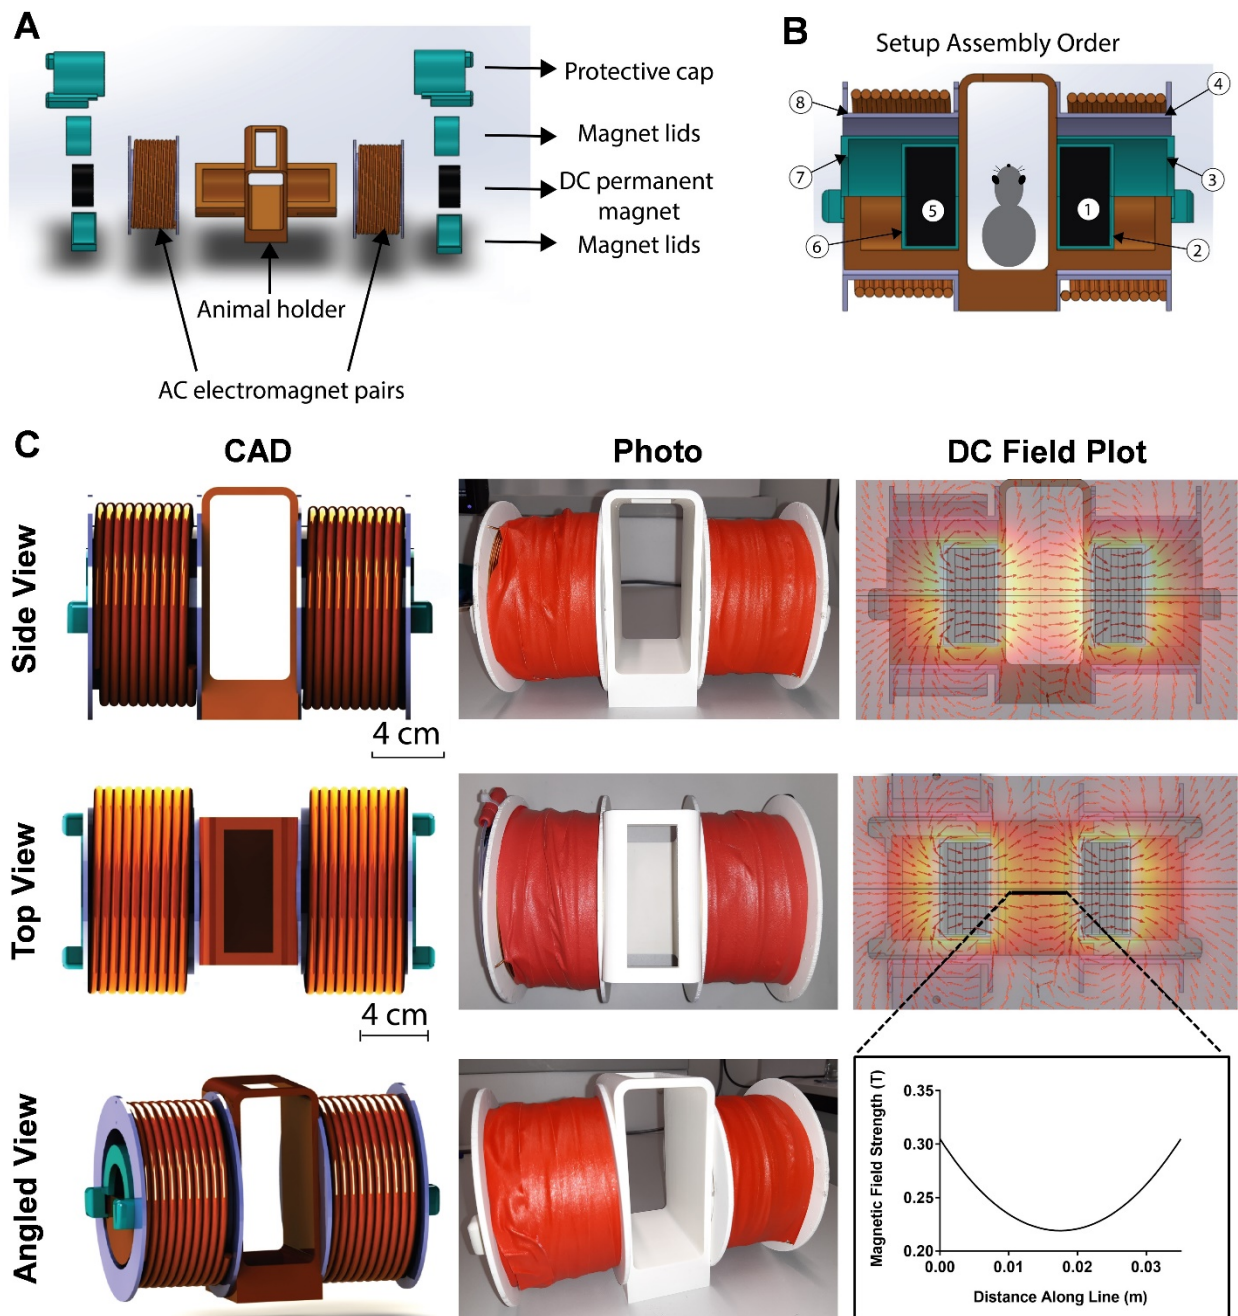

**Figure S5. Schematic and images of *in vivo* magnetic stimulation setup.** Disassembled schematic shows individual parts of the coil system (A). Internal view of coil system shows layout of components as assembled, with numbers describing the assembly order (B). Schematic, picture, and schematic overlaid with DC magnetic field simulation of coil system from the side view and top view (C). Schematic and picture of coil from an angled view. Plot showing magnitude of the magnetic flux density along the labeled line in Tesla (C). Photo credit: Kristen Kozielski, Max Planck Institute for Intelligent Systems (C).





## **Supplementary Movie Captions**

### **Movie S1. *In vitro* Ca<sup>2+</sup> recording of neuronal cell activity.**

This video shows fluctuations in intracellular Ca<sup>2+</sup> signaling in untreated cells, cells treated with either no NPs, MSNPs, or PENPs and an AC and DC magnetic field, or cells treated with MENPs, and either no field, a DC magnetic field, an AC magnetic field, or an AC and DC magnetic field. (Fig. 2A-C). Calibration bars represent  $\Delta F/F_0$ . Videos are 20X real-time.

### **Movie S2. Catwalk video recording of mice behavior.**

This video shows catwalk video recording of mice treated with MSNPs and an AC magnetic field, MSNPs and an AC and DC magnetic field, MENPs and an AC field, or MENPs and an AC and DC magnetic field (Fig. 3H).
